# Supplementary material for: Perceptions of managerial competencies, style, and characteristics among professionals in nursing
Source: PubMed Central journal article supplement (PMC3081218; doi:10.3325/cmj.2011.52.198), 2011-04
Supplement: CroatMedJ_52_s002.pdf [file CroatMedJ_52_s002.pdf]

## QUESTIONNAIRE FOR LEADERS

| Demographic data:                                                                                                                                                               | Year of employment:                                                                                             | Level of education :                                                                                    |
|---------------------------------------------------------------------------------------------------------------------------------------------------------------------------------|-----------------------------------------------------------------------------------------------------------------|---------------------------------------------------------------------------------------------------------|
| Gender <b>M</b> <b>F</b><br>Age .....year.<br>Institution of work:<br>.....<br>Year of employment in this<br>institution:.....year.<br>Year of leading position:<br>.....year . | 1. <5 let<br>2. 5 - 10 let<br>3. 11 - 15 let<br>4. 16 - 20 let<br>5. 21- 25 let<br>6. 26 - 30 let<br>7. > 30let | 1. SECONDARY SCHOOL<br>2. HIGH SCHOOL<br>3. COLLEGE<br>4. UNIVERSITY LEVEL<br>5. MASTER LEVEL<br>6. PhD |

| Each claim that describe you or your co-workers<br>mark with suitable assessment          | Totally<br>disagree | Disagree | Partly<br>agree | Agree | Totally<br>agree |
|-------------------------------------------------------------------------------------------|---------------------|----------|-----------------|-------|------------------|
| 1.I consistently work on standard procedures.                                             | 1                   | 2        | 3               | 4     | 5                |
| 2.Co-workers respect me.                                                                  | 1                   | 2        | 3               | 4     | 5                |
| 3.We are achiving asked goals on the department                                           | 1                   | 2        | 3               | 4     | 5                |
| 4.I know how to recognize and identify problems.                                          | 1                   | 2        | 3               | 4     | 5                |
| 5.In conflict situations I use a compromise.                                              | 1                   | 2        | 3               | 4     | 5                |
| 6.I show personal interest for employees development.                                     | 1                   | 2        | 3               | 4     | 5                |
| 7.It is necessary to avoid routine work                                                   | 1                   | 2        | 3               | 4     | 5                |
| 8.Introduction of changes is necessarily needed in hospital.                              | 1                   | 2        | 3               | 4     | 5                |
| 9.I encourage co-workers to improve the quality of work                                   | 1                   | 2        | 3               | 4     | 5                |
| 10.Successful work requires mutual trust, support and communication.                      | 1                   | 2        | 3               | 4     | 5                |
| 11.Because improvements are not necessary, it is not necessary to promote initiatives     | 1                   | 2        | 3               | 4     | 5                |
| 12.Working activities should be carefully organized                                       | 1                   | 2        | 3               | 4     | 5                |
| 13.I allow that co-workers can show their abilities and knowledge.                        | 1                   | 2        | 3               | 4     | 5                |
| 14.Before I accept decision I introduce it to co-workers.                                 | 1                   | 2        | 3               | 4     | 5                |
| 15.At decision making I use material rewards.                                             | 1                   | 2        | 3               | 4     | 5                |
| 16.It is important to achieve good results regardless of the resources spent.             | 1                   | 2        | 3               | 4     | 5                |
| 17.As a leader in nursing I have enough knowledge of leadership.                          | 1                   | 2        | 3               | 4     | 5                |
| 18.At solving conflict I consider my neutrality.                                          | 1                   | 2        | 3               | 4     | 5                |
| 19.I always talk with co-workers about problems and solutions.                            | 1                   | 2        | 3               | 4     | 5                |
| 20.I informed co-workers about changes which effect on work                               | 1                   | 2        | 3               | 4     | 5                |
| 21.I consider the arrangements at work.                                                   | 1                   | 2        | 3               | 4     | 5                |
| 22.When something goes wrong, it is necessary to establish control.                       | 1                   | 2        | 3               | 4     | 5                |
| 23.Communication at department which I lead is spontaneous and running in all directions. | 1                   | 2        | 3               | 4     | 5                |
| 24.I am emphasizing common interests and goals at solving conflicts.                      | 1                   | 2        | 3               | 4     | 5                |
| 25.I am solving problems continuously, that they aren't accumulating.                     | 1                   | 2        | 3               | 4     | 5                |
| 26.I take care that co-workers know the vision of our organization.                       | 1                   | 2        | 3               | 4     | 5                |

| Each claim that describe you or your co-workers<br>mark with suitable assessment            | Totally<br>disagree | Disagree | Partly<br>agree | Agree | Totally<br>agree |
|---------------------------------------------------------------------------------------------|---------------------|----------|-----------------|-------|------------------|
| 27.I reward collaborators adequately for work.                                              | 1                   | 2        | 3               | 4     | 5                |
| 28.I ensure that employees are motivated.                                                   | 1                   | 2        | 3               | 4     | 5                |
| 29.I praise co-workers for the contributions of the team work.                              | 1                   | 2        | 3               | 4     | 5                |
| 30.When I delegate tasks to co-workers, I also trust them that they will finish tasks well. | 1                   | 2        | 3               | 4     | 5                |
| 31.I decided in accordance with my competencies and responsibilities.                       | 1                   | 2        | 3               | 4     | 5                |
| 32.I am always ready to help my superior.                                                   | 1                   | 2        | 3               | 4     | 5                |
| 33.I encourage initiative and innovation to improve quality.                                | 1                   | 2        | 3               | 4     | 5                |
| 34.I am giving to the partners feeling of equivalences at a conversation..                  | 1                   | 2        | 3               | 4     | 5                |
| 35.I am solving problems systematically.                                                    | 1                   | 2        | 3               | 4     | 5                |
| 36.At solving conflict I use power.                                                         | 1                   | 2        | 3               | 4     | 5                |
| 37.I offer co-workers possibility for professional development.                             | 1                   | 2        | 3               | 4     | 5                |
| 38.Good interpersonal relationships are important to me..                                   | 1                   | 2        | 3               | 4     | 5                |
| 39.I encourage innovative proposals of my co-workers.                                       | 1                   | 2        | 3               | 4     | 5                |
| 40.Between co-workers it is necessary to maintain friendly relationship.                    | 1                   | 2        | 3               | 4     | 5                |
| 41.I encourage team work for solving complex tasks.                                         | 1                   | 2        | 3               | 4     | 5                |
| 42.I am confronting conflicts actively.                                                     | 1                   | 2        | 3               | 4     | 5                |
| 43.Material stimulations and rewards are important.                                         | 1                   | 2        | 3               | 4     | 5                |
| 44.I always set realistic goals.                                                            | 1                   | 2        | 3               | 4     | 5                |
| 45.I equally consider all proposals to solve the problem.                                   | 1                   | 2        | 3               | 4     | 5                |
| 46.I forward to the co-workers all necessary information in time.                           | 1                   | 2        | 3               | 4     | 5                |
| 47.I get a suitable payment for my work.                                                    | 1                   | 2        | 3               | 4     | 5                |
| 48.I am using different pressures at deciding (hazing, reproaches, transfer,...).           | 1                   | 2        | 3               | 4     | 5                |
| 49.At the department, which I lead, we have good interpersonal relationships.               | 1                   | 2        | 3               | 4     | 5                |
| 50.I delegate also more demanding tasks that require a higher level of responsibility.      | 1                   | 2        | 3               | 4     | 5                |
| 51.Our organization has a good reputation in public.                                        | 1                   | 2        | 3               | 4     | 5                |
| 52.I accept responsibility for my decisions.                                                | 1                   | 2        | 3               | 4     | 5                |
| 53.I always praise good work.                                                               | 1                   | 2        | 3               | 4     | 5                |
| 54.When I introduce a new task, co-workers are willing to actively participate.             | 1                   | 2        | 3               | 4     | 5                |
| 55.I know key values of our organization.                                                   | 1                   | 2        | 3               | 4     | 5                |
| 56.When the organization is successful, the introduction of changes is not necessary.       | 1                   | 2        | 3               | 4     | 5                |
| 57.I gained knowledge of leadership per wish of employer.                                   | 1                   | 2        | 3               | 4     | 5                |
| 58.Employees are the most important wealth that our hospital has.                           | 1                   | 2        | 3               | 4     | 5                |
| 59.I take care of pleasant working atmosphere.                                              | 1                   | 2        | 3               | 4     | 5                |
| 60.Because solving conflict is uncomfortable, I try to avoid them.                          | 1                   | 2        | 3               | 4     | 5                |
| 61.I encourage members of team that they help and support themselves.                       | 1                   | 2        | 3               | 4     | 5                |
| 62.I assigned tasks to co-workers that they are challenge for them.                         | 1                   | 2        | 3               | 4     | 5                |
| 63.I tell my views and co-workers must follow them.                                         | 1                   | 2        | 3               | 4     | 5                |
| 64.At decision making I use my personal power.                                              | 1                   | 2        | 3               | 4     | 5                |
| 65.When I introduce changes I predict potential obstacles                                   | 1                   | 2        | 3               | 4     | 5                |
| 66.I am talking with co-workers a lot, through conversation I know them better.             | 1                   | 2        | 3               | 4     | 5                |
| 67.I encourage co-workers to suggest possible solutions of the problem                      | 1                   | 2        | 3               | 4     | 5                |
| 68.Co-workers on the department can tell what they think.                                   | 1                   | 2        | 3               | 4     | 5                |
| 69.At solving conflicts I am looking for a solution with co-workers.                        | 1                   | 2        | 3               | 4     | 5                |
| 70.Co-workers knows key values of our organization                                          | 1                   | 2        | 3               | 4     | 5                |
| 71.I assign working tasks to co-workers according to their knowledge.                       | 1                   | 2        | 3               | 4     | 5                |
| 72.At decision making I use nonmaterial rewards.                                            | 1                   | 2        | 3               | 4     | 5                |
| 73.My messages to co-workers are clear and understandable.                                  | 1                   | 2        | 3               | 4     | 5                |
| 74.Co-workers can use their knowledge, abilities and skills.                                | 1                   | 2        | 3               | 4     | 5                |
| 75.I express anger an inappropriate manner                                                  | 1                   | 2        | 3               | 4     | 5                |
| 76.I give opportunity to co-workers to participate in the working team.                     | 1                   | 2        | 3               | 4     | 5                |
| 77.The leadership knowledge I have gained before I take a leadership position               | 1                   | 2        | 3               | 4     | 5                |
| 78.I am proud that I work in this organization.                                             | 1                   | 2        | 3               | 4     | 5                |
| 79.I encourage innovative proposals of co-workers.                                          | 1                   | 2        | 3               | 4     | 5                |
| 80.I praise co-workers, because it effects on their satisfaction.                           | 1                   | 2        | 3               | 4     | 5                |
| 81.My leadership is improved since then I became a leader.                                  | 1                   | 2        | 3               | 4     | 5                |
| 82.I accept professionally established decisions.                                           | 1                   | 2        | 3               | 4     | 5                |

| Each claim that describe you or your co-workers<br>mark with suitable assessment                 | Totally<br>disagree | Dusagree | Partly<br>agree | Agree | Totally<br>agree |
|--------------------------------------------------------------------------------------------------|---------------------|----------|-----------------|-------|------------------|
| 83. When I scold, it is clear that something was made wrong.                                     | 1                   | 2        | 3               | 4     | 5                |
| 84. I am consistent at complying rules.                                                          | 1                   | 2        | 3               | 4     | 5                |
| 85. I think that my working place is respectable.                                                | 1                   | 2        | 3               | 4     | 5                |
| 86. I adapt my communications to different people and situations.                                | 1                   | 2        | 3               | 4     | 5                |
| 87. I use the power management hierarchy at decision making.                                     | 1                   | 2        | 3               | 4     | 5                |
| 88. It is necessary to considered superior.                                                      | 1                   | 2        | 3               | 4     | 5                |
| 89. I listen and I consider suggestions of co-workers.                                           | 1                   | 2        | 3               | 4     | 5                |
| 90. My way of communication have a positive impact on interpersonal relationships.               | 1                   | 2        | 3               | 4     | 5                |
| 91. <u>I wouldn't leave organisation, although I would get better job.</u>                       | 1                   | 2        | 3               | 4     | 5                |
| 92. Employees in nursing must continually educate.                                               | 1                   | 2        | 3               | 4     | 5                |
| 93. Leadership is responsible and accountable for making changes.                                | 1                   | 2        | 3               | 4     | 5                |
| 94. I represent a vision of our organization with my behavior                                    | 1                   | 2        | 3               | 4     | 5                |
| 95. I argue my decisions suitable.                                                               | 1                   | 2        | 3               | 4     | 5                |
| 96. Agreement is base of mutual communication.                                                   | 1                   | 2        | 3               | 4     | 5                |
| 97. I recognize experiencing emotions of other people.                                           | 1                   | 2        | 3               | 4     | 5                |
| 98. I am always willing to help my co-workers.                                                   | 1                   | 2        | 3               | 4     | 5                |
| 99. Every leader in nursing need additional knowledge of leadership.                             | 1                   | 2        | 3               | 4     | 5                |
| 100. Co-workers trust me.                                                                        | 1                   | 2        | 3               | 4     | 5                |
| 101. Praise of good work I present in public.                                                    | 1                   | 2        | 3               | 4     | 5                |
| 102. <u>Changes are easiest in knowledge, heavier in values and most difficult in knowledge.</u> | 1                   | 2        | 3               | 4     | 5                |
| 103. My development in the hospital is in line with my personal goals.                           | 1                   | 2        | 3               | 4     | 5                |
| 104. <u>In emotionally straining and stressful situations I keep sensibleness.</u>               | 1                   | 2        | 3               | 4     | 5                |
| 105. I encouraged co-workers to participate in working tasks.                                    | 1                   | 2        | 3               | 4     | 5                |
| 106. <u>Employees supporting each other and are prepared to help.</u>                            | 1                   | 2        | 3               | 4     | 5                |
| 107. <u>I encourage members of team, that they work for common goals.</u>                        | 1                   | 2        | 3               | 4     | 5                |
| 108. At introducing changes I offer appropriate support to co-workers.                           | 1                   | 2        | 3               | 4     | 5                |
| 109. I speak only positively about our organization                                              | 1                   | 2        | 3               | 4     | 5                |
| 110. I am ruled for consistent derivation of tasks and goals.                                    | 1                   | 2        | 3               | 4     | 5                |
| 111. I am open for constructive criticism.                                                       | 1                   | 2        | 3               | 4     | 5                |
| 112. Tecnic and technology are essential for success.                                            | 1                   | 2        | 3               | 4     | 5                |
| 113. Co-workers are independence about delegated tasks.                                          | 1                   | 2        | 3               | 4     | 5                |
| 114. I believe in the successful development of our organization.                                | 1                   | 2        | 3               | 4     | 5                |
| 115. I give criticism to everybody, but only when we are alone.                                  | 1                   | 2        | 3               | 4     | 5                |
| 116. I use may professional knowledge at decision making.                                        | 1                   | 2        | 3               | 4     | 5                |
| 117. Our hospital builds its growth on individual developing.                                    | 1                   | 2        | 3               | 4     | 5                |
| 118. I make personal expression and personal development for co-workers.                         | 1                   | 2        | 3               | 4     | 5                |
| 119. I listen co-workers carefully.                                                              | 1                   | 2        | 3               | 4     | 5                |
| 120. Friendly relationships is not necessary essential for good working results.                 | 1                   | 2        | 3               | 4     | 5                |
| 121. I approach active at solving problems.                                                      | 1                   | 2        | 3               | 4     | 5                |
| 122. I am kind and indulgent to co-workers.                                                      | 1                   | 2        | 3               | 4     | 5                |
| 123. For successful leadership in nursing is necessary to define managerial competences.         | 1                   | 2        | 3               | 4     | 5                |
| 124. Working with co-workers is closely linked to the strategy of our hospital.                  | 1                   | 2        | 3               | 4     | 5                |
| 125. I do what I am saying-.                                                                     | 1                   | 2        | 3               | 4     | 5                |
| 126. I am imposing my opinion to the co-workers.                                                 | 1                   | 2        | 3               | 4     | 5                |
| 127. Making changes is always difficult for employees.                                           | 1                   | 2        | 3               | 4     | 5                |
| 128. Making changes should be conducted only if the organization is in crisis.                   | 1                   | 2        | 3               | 4     | 5                |
| 129. I include co-workers in decisions about changes.                                            | 1                   | 2        | 3               | 4     | 5                |
| 130. My work is useful and important.                                                            | 1                   | 2        | 3               | 4     | 5                |
| 131. I feel responsible for the results of main work.                                            | 1                   | 2        | 3               | 4     | 5                |
| 132. My work effects at work of co-workers.                                                      | 1                   | 2        | 3               | 4     | 5                |
| 133. <u>I am independent and autonomous at work.</u>                                             | 1                   | 2        | 3               | 4     | 5                |
| 134. I know the results of my work.                                                              | 1                   | 2        | 3               | 4     | 5                |

| <b>PERSONALITY CHARACTERISTICS</b> | <b>Totally disagree</b> | <b>Disagree</b> | <b>Partly agree</b> | <b>Agree</b> | <b>Totally agree</b> | <b>RANK (1-10)</b> |
|------------------------------------|-------------------------|-----------------|---------------------|--------------|----------------------|--------------------|
| <b>Decisiveness</b>                | 1                       | 2               | 3                   | 4            | 5                    |                    |
| <b>Initiative</b>                  | 1                       | 2               | 3                   | 4            | 5                    |                    |
| <b>Innovation</b>                  | 1                       | 2               | 3                   | 4            | 5                    |                    |
| <b>Ambition</b>                    | 1                       | 2               | 3                   | 4            | 5                    |                    |
| <b>Persistence</b>                 | 1                       | 2               | 3                   | 4            | 5                    |                    |
| <b>Communication</b>               | 1                       | 2               | 3                   | 4            | 5                    |                    |
| <b>Self-confidence</b>             | 1                       | 2               | 3                   | 4            | 5                    |                    |
| <b>Adaptability</b>                | 1                       | 2               | 3                   | 4            | 5                    |                    |
| <b>Activity at work</b>            | 1                       | 2               | 3                   | 4            | 5                    |                    |
| <b>Tact</b>                        | 1                       | 2               | 3                   | 4            | 5                    |                    |
| <b>Thoughtfulness</b>              | 1                       | 2               | 3                   | 4            | 5                    |                    |
| <b>Honesty</b>                     | 1                       | 2               | 3                   | 4            | 5                    |                    |
| <b>Sociability</b>                 | 1                       | 2               | 3                   | 4            | 5                    |                    |
| <b>Reliability</b>                 | 1                       | 2               | 3                   | 4            | 5                    |                    |
| <b>Objectivity</b>                 | 1                       | 2               | 3                   | 4            | 5                    |                    |
| <b>Cooperation</b>                 | 1                       | 2               | 3                   | 4            | 5                    |                    |
| <b>Teamwork</b>                    | 1                       | 2               | 3                   | 4            | 5                    |                    |
| <b>Organization skills</b>         | 1                       | 2               | 3                   | 4            | 5                    |                    |
| <b>Responsibility</b>              | 1                       | 2               | 3                   | 4            | 5                    |                    |
| <b>Emotional intelligence</b>      | 1                       | 2               | 3                   | 4            | 5                    |                    |
